# Supplementary material for: Functionalized nanocomposite for simultaneous removal of antibiotics and As(iii) in swine urine aqueous solution and soil
Source: Royal Society of Chemistry journal article supplement (doi:10.1039/c8en00870a), 2018-01-01
Supplement: c8en00870a1.pdf [file c8en00870a1.pdf]

## Supporting Information

### **Functionalized nanocomposite for simultaneous removal of antibiotics and As(III) in swine urine aqueous solution and soil**

Dongfang Wang,<sup>ab</sup> Zhangyu Dai,<sup>ab</sup> Xian Shu,<sup>ab</sup> Po Bian,<sup>ac</sup> Lifang Wu,<sup>ac</sup> Dongqing Cai,<sup>\*ac</sup> Zhengyan Wu<sup>\*ac</sup>

*<sup>a</sup>Key Laboratory of High Magnetic Field and Ion Beam Physical Biology, Hefei Institutes of Physical Science, Chinese Academy of Sciences, Hefei, Anhui 230031, People's Republic of China*

*<sup>b</sup>University of Science and Technology of China, Hefei, Anhui 230026, People's Republic of China*

*<sup>c</sup>Key Laboratory of Environmental Toxicology and Pollution Control Technology of Anhui Province, Hefei Institutes of Physical Science, Chinese Academy of Sciences, Hefei, Anhui 230031, People's Republic of China*

**Number of figure: 6**

**Number of table: 2**

**Number of pages: 9**

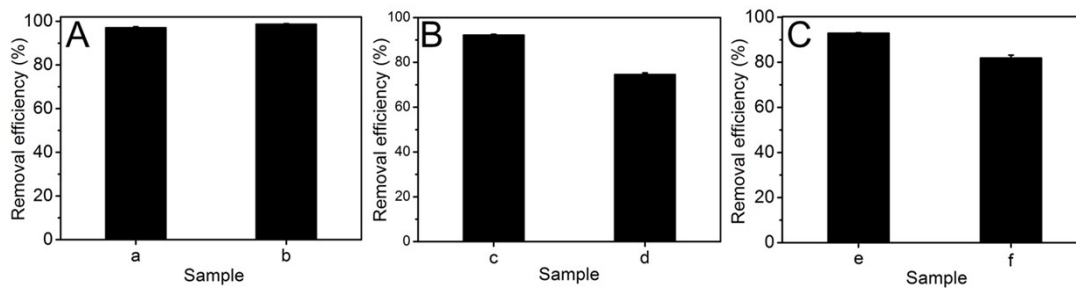

Fig. S1 (A) Removal efficiencies of (a) OAM and (b) OAM/As on CTC at 30°C. (B) Removal efficiencies of (c) OAM and (d) OAM/CTC on As(III) at 30°C. (C) Removal efficiencies of OAM on (e) CTC and (f) As(III) simultaneous at 30°C.

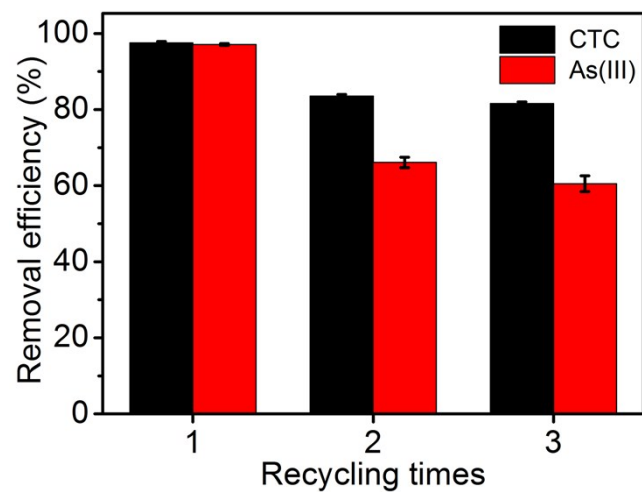

Fig. S2 Reuse of OAM for three cycles.

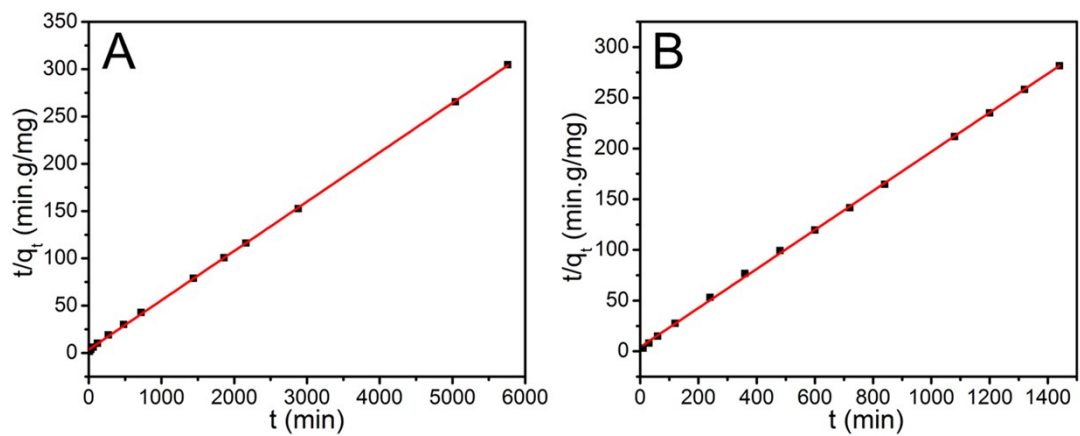

Fig. S3 The plots of pseudo-second-order kinetics for the adsorption of CTC (A) and As(III) (B) on OAM.

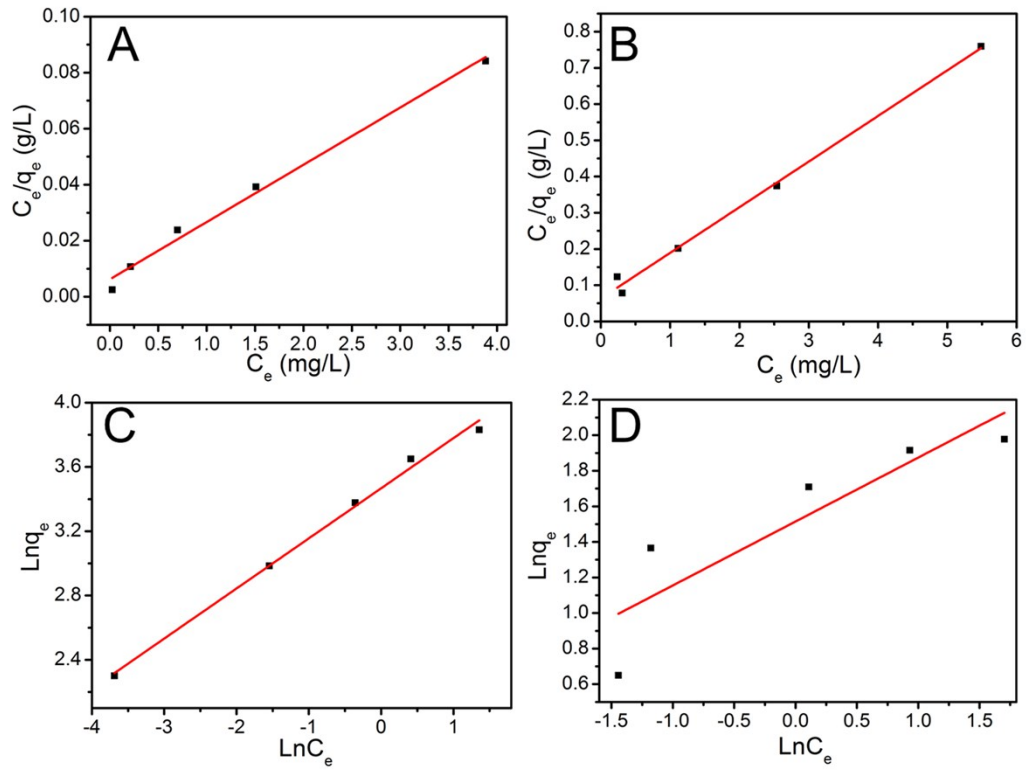

Fig. S4 Langmuir plots for (A) CTC and (B) As(III); Freundlich plots for (C) CTC and (D) As(III).

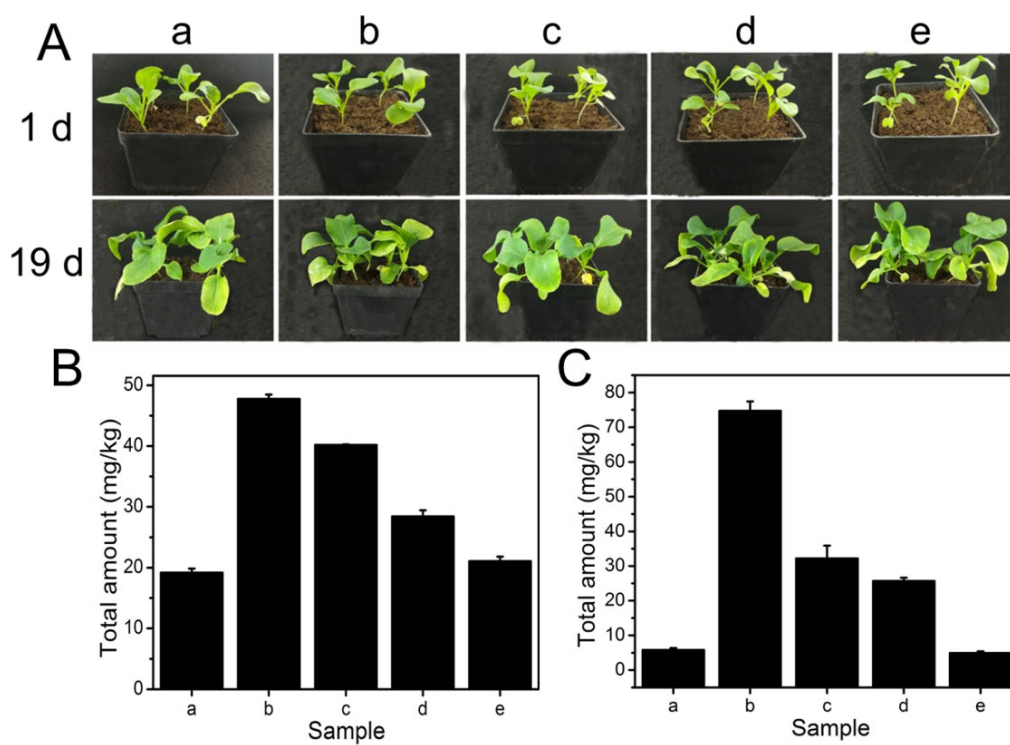

Fig. S5 (A) Digital photographs and (B and C) total amounts of CTC and As of pakchoi in peat soil (130 g) irrigated by (a) SUAS and (b-e) SUAS containing CTC and As(III) treated with 0, 0.3, 0.6, and 0.9 g of OAM.

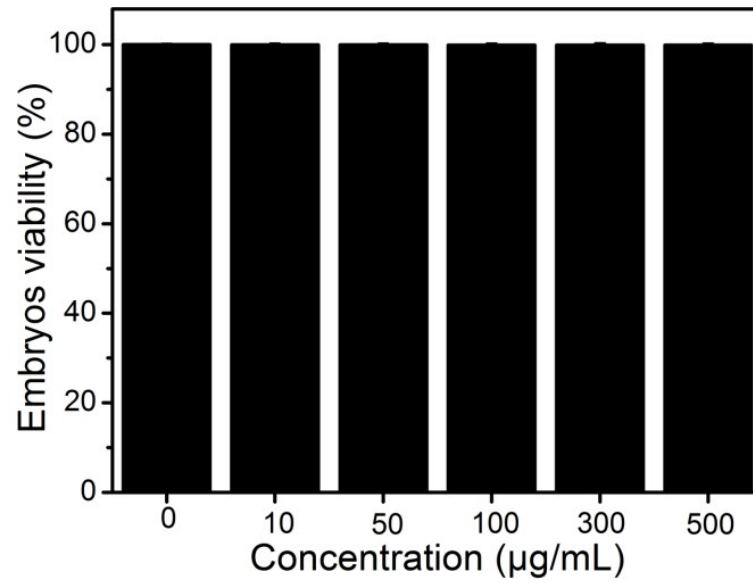

Fig. S6 Embryos viability of *Caenorhabditis elegans* after 24 h treatment by OAM with different concentrations.

Table S1 Kinetic parameters for the adsorption of CTC and As(III) by OAM

| pseudo-second-order |              |                       |        |
|---------------------|--------------|-----------------------|--------|
| Pollutants          | $q_e$ (mg/g) | $k_2$ (g/(mg·min))    | $R^2$  |
| CTC                 | 19.18        | $7.66 \times 10^{-4}$ | 0.9998 |
| As(III)             | 5.19         | $8.85 \times 10^{-3}$ | 0.9996 |



Table S2 Adsorption isotherm parameters for CTC and As(III) by OAM at 30°C

| Pollutants | Langmuir model        |          |                | Freundlich model |                                                |                |
|------------|-----------------------|----------|----------------|------------------|------------------------------------------------|----------------|
|            | Q <sub>0</sub> (mg/g) | b (L/mg) | R <sup>2</sup> | n                | K <sub>F</sub> [(mg/g) (L/mg) <sup>1/n</sup> ] | R <sup>2</sup> |
| CTC        | 48.92                 | 3.28     | 0.9886         | 3.21             | 1.24                                           | 0.9935         |
| As(III)    | 7.94                  | 1.20     | 0.9931         | 2.78             | 0.42                                           | 0.7227         |
